# Supplementary material for: Experimental and theoretical insights into benzene-1,4-dicarboxylic acid based Co-MOFs: an anodic material for expedient battery-supercapacitor hybrids
Source: Royal Society of Chemistry journal article supplement (doi:10.1039/d4se00590b), 2024-01-01
Supplement: d4se00590b1.pdf [file d4se00590b1.pdf]

# **Experimental And Theoretical Insight of Benzene-1,4-Dicarboxylic Acid Based Co-MOF: An Anodic Material for Expedient Battery- Supercapacitor Hybrids**

Junaid Khan<sup>a, b \*</sup>, Anique Ahmed<sup>c</sup>, Muhammad Imran Saleem<sup>d</sup>, Abdullah A. Al-Kahtani<sup>e</sup>

<sup>a</sup>Department of Physics, Government Postgraduate Collage No.1, Abbottabad, Khyber Pakhtunkhwa, Pakistan

<sup>b</sup>Department Of Higher Education Achieves and Libraries, Government of Khyber Pakhtunkhwa, Pakistan

<sup>c</sup>Faculty of Engineering Sciences, GIK Institute of Engineering Sciences and Technology, Topi 23640, Khyber Pakhtunkhwa, Pakistan

<sup>d</sup>Department of Chemical and Biological Engineering, Gachon University, 1342 Seongnam-daero, Seongnam13120, Republic of Korea

<sup>e</sup>Chemistry Department, Collage of Science, King Saud University, P. O. Box 2455, Riyadh-22451, Saudi Arabia

\*Email: [junaidkhan.nanotech@gmail.com](mailto:junaidkhan.nanotech@gmail.com)

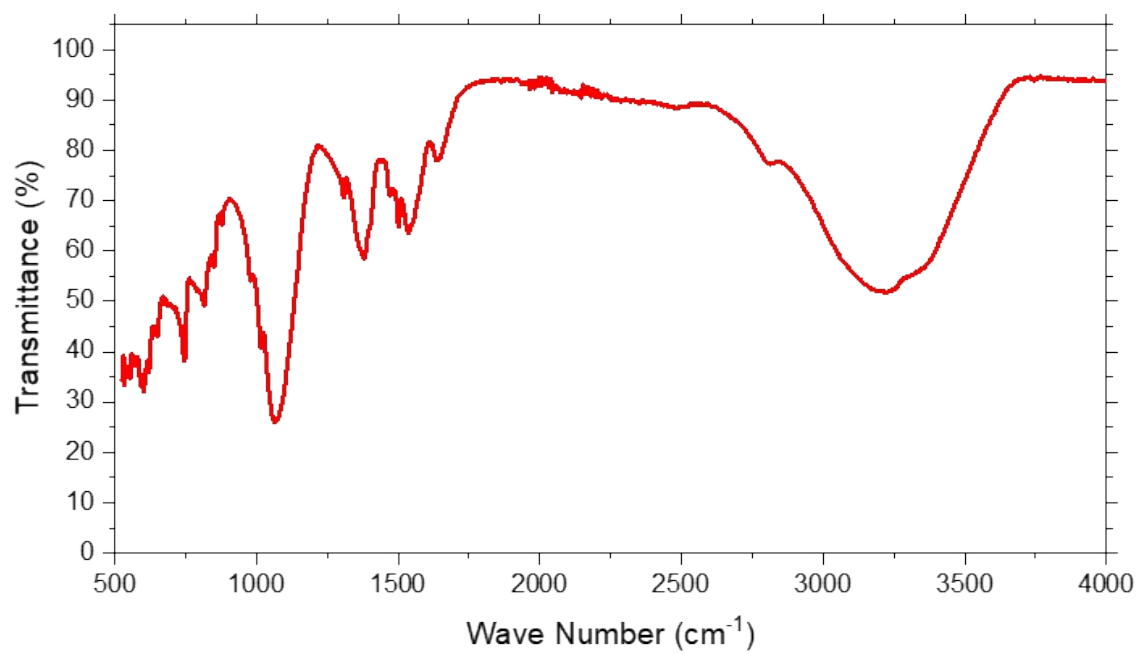

Figure S1: FTIR results of Co-MOF.

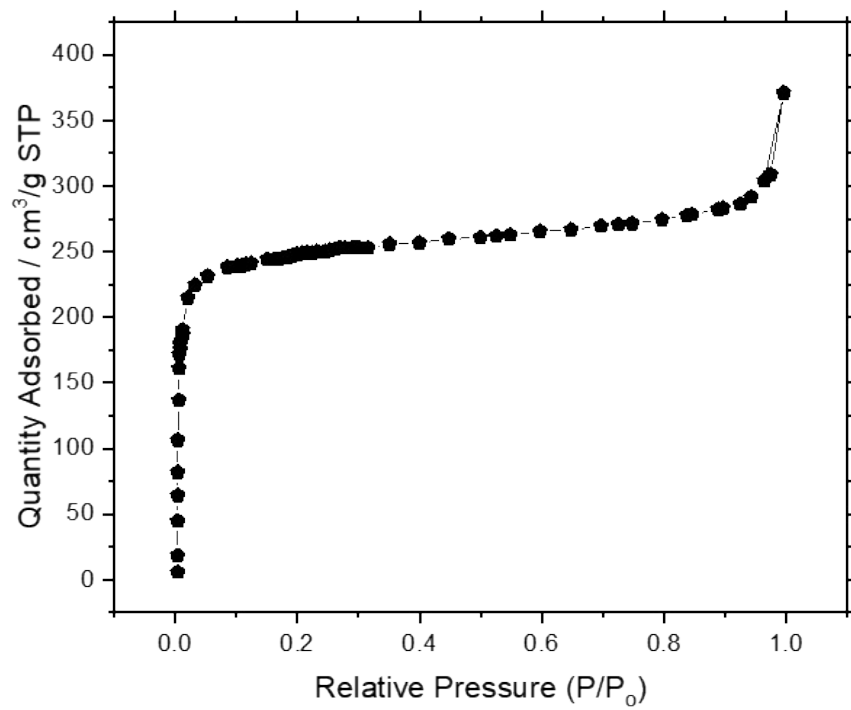

**Figure S2:** N<sub>2</sub> adsorption/desorption curve

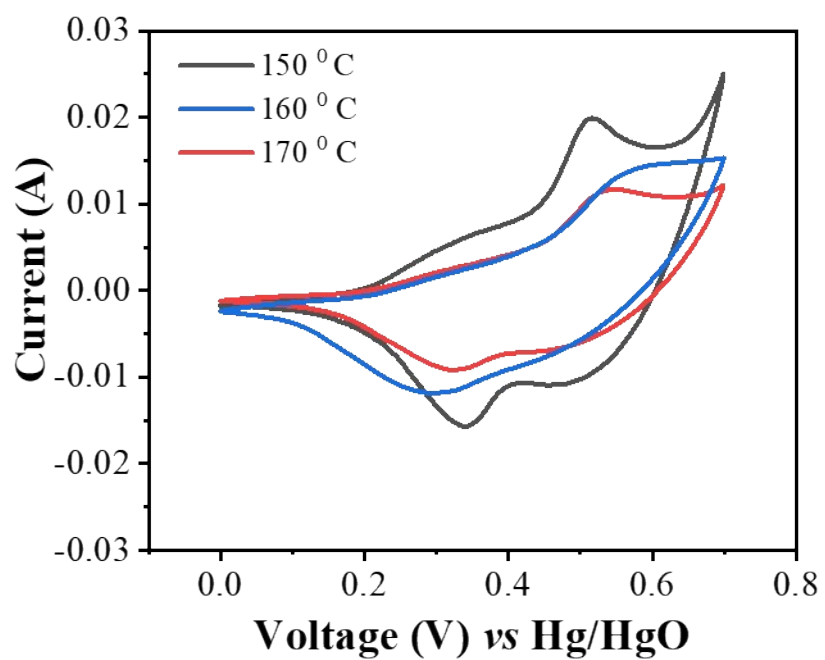

**Figure S3:** CV outcomes of Co-MOF synthesized via hydrothermal approach employing different thermal environment, indicating the dominant performance of one synthesized at 150 °C
